# Supplementary material for: Hinge point emergence in mammalian spinal neurulation
Source: PubMed Central journal article supplement — Proc Natl Acad Sci U S A. 2022 May 13;119(20):e2117075119. doi: 10.1073/pnas.2117075119 (PMC9172135; doi:10.1073/pnas.2117075119), 2022-05-13
Supplement: pnas.2117075119.sapp.pdf [file pnas.2117075119.sapp.pdf]

## **Supplementary Information for**

### **Hinge point emergence in mammalian spinal neurulation**

Veerle de Goederen, Roman Vetter, Katie McDole and Dagmar Iber

Dagmar Iber.

E-mail: [dagmar.iber@bsse.ethz.ch](mailto:dagmar.iber@bsse.ethz.ch)

#### **This PDF file includes:**

Figs. S1 to S2

Tables S1 to S2

Legends for Movies S1 to S17

#### **Other supplementary materials for this manuscript include the following:**

Movies S1 to S17

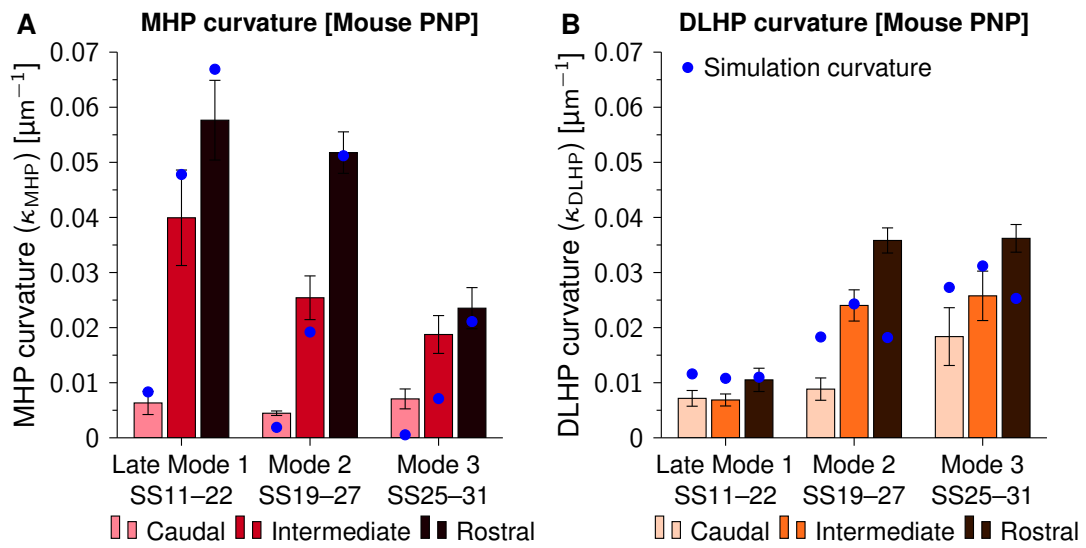

**Fig. S1.** Comparison of hinge point curvatures between experimental measurements and simulations. (A) Median hinge point curvature. (B) Dorsolateral hinge point curvature. Bars denote experimental quantifications in the mouse posterior neuropore (PNP); error bars are SEM from  $N = 5, 12, 7$  measurements for folding modes 1–3. Blue dots are individual Model II simulations with midline thickness ratio  $h_{NP}/h_{HP} = 1.5$  at mesoderm expansion factors  $\alpha = 0.85, 0.45, 0.15$  (representing modes 1, 2, 3) at time points  $t = 0.33, 0.66, 1$  (representing caudal, intermediate and rostral PNP positions). Curvature was measured as illustrated in Fig. S2E.

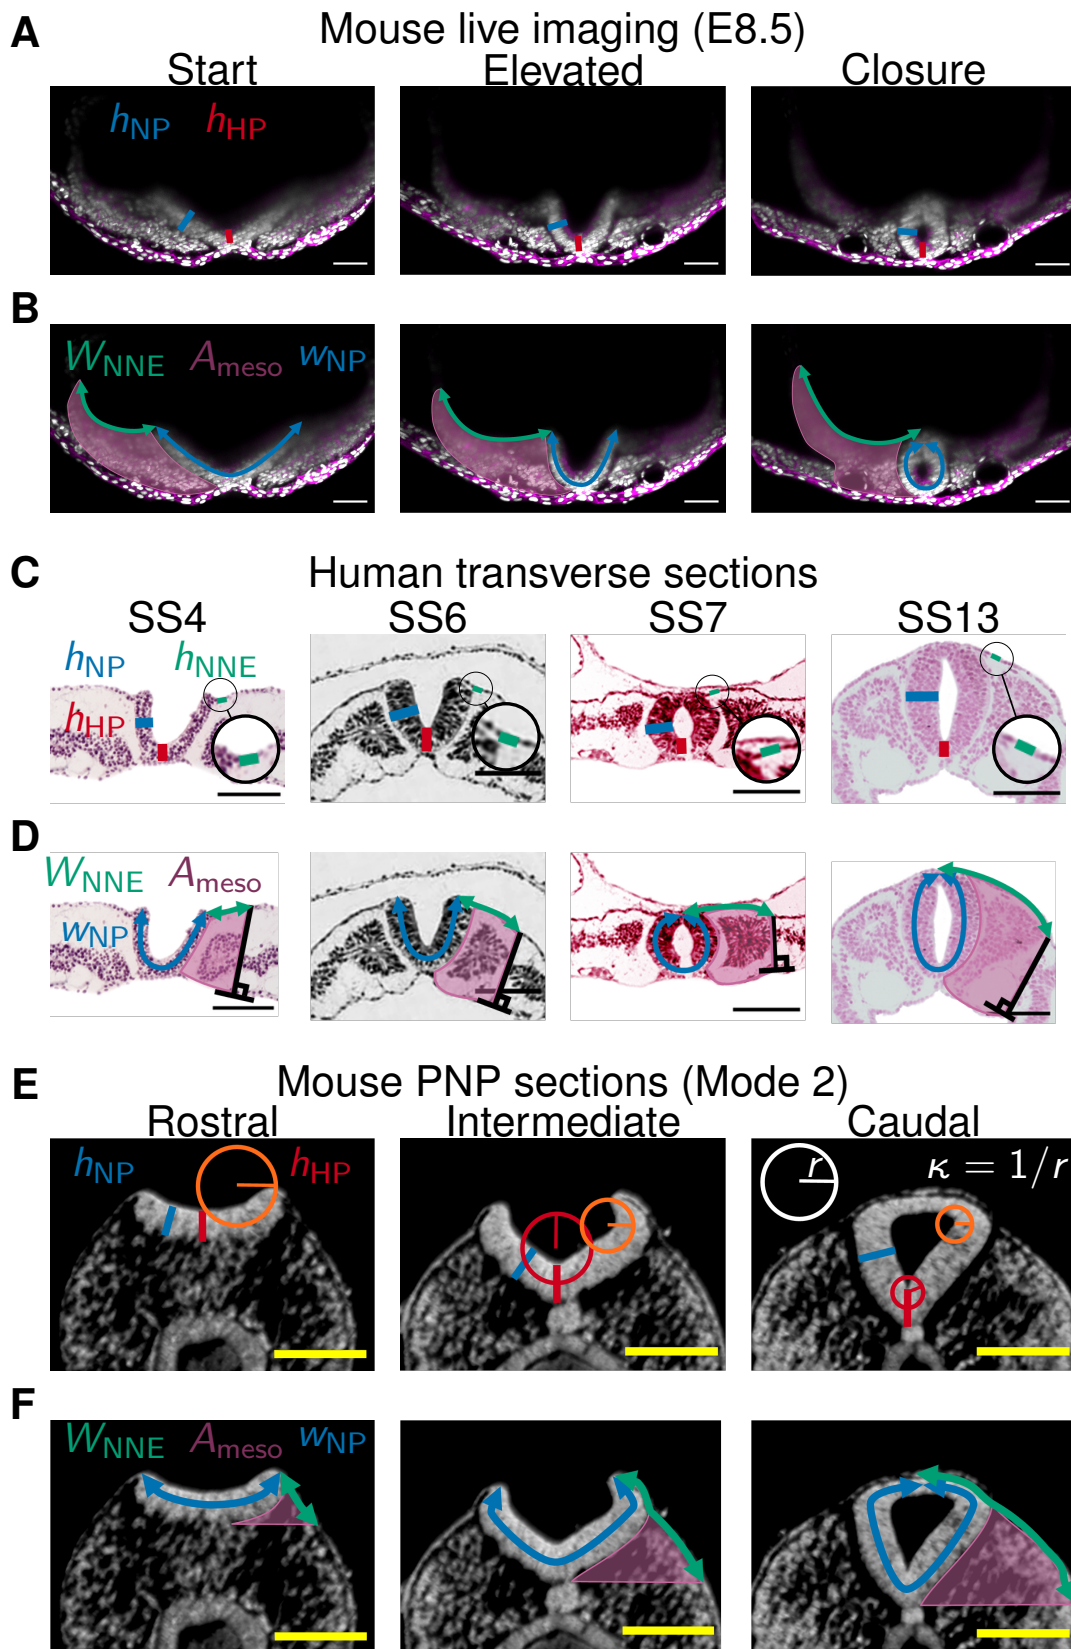

**Fig. S2.** Illustration of measurements performed in mouse live imaging data (A, B), human transverse sections (C, D) and mouse posterior neuropore data (E, F). (A, C, E) show neural plate height ( $h_{NP}$ , blue) and median hinge point height measurements ( $h_{HP}$ , red). (C) additionally shows NNE height ( $h_{NNE}$ , green, close-up circles) and (E) additionally shows the radius of curvature  $r$  of the median hinge point (red circles) and dorsolateral hinge point (orange circles). (B, D, F) show neural plate width ( $w_{NP}$ , blue), non-neural ectoderm width ( $w_{NNE}$ , green) and mesoderm area ( $A_{meso}$ , pink). Scale bars: 100  $\mu$ m.

**Table S1. Mouse live imaging measurements per somite position and folding stage**

| Somite position | Folding stage | <i>N</i> |
|-----------------|---------------|----------|
| 1               | start         | 2        |
| 1               | elevated      | 1        |
| 1               | closure       | 1        |
| 2               | start         | 3        |
| 2               | elevated      | 2        |
| 2               | closure       | 2        |
| 3               | start         | 3        |
| 3               | elevated      | 3        |
| 3               | closure       | 3        |
| 4               | start         | 3        |
| 4               | elevated      | 3        |
| 4               | closure       | 3        |
| 5               | start         | 3        |
| 5               | elevated      | 3        |
| 5               | closure       | 3        |
| 6               | start         | 3        |
| 6               | elevated      | 3        |
| 6               | closure       | 3        |
| 7               | start         | 2        |
| 7               | elevated      | 2        |
| 7               | closure       | 2        |
| 8               | start         | 2        |
| 8               | elevated      | 1        |
| 8               | closure       | 1        |

**Table S2. Overview of mouse specimens used for posterior neuropore analysis**

| Origin | embryo ID | Somite stage (estimate) | Folding mode |
|--------|-----------|-------------------------|--------------|
| EMAP   | EMA:24    | 11                      | 1            |
| EMAP   | EMA:27    | 17                      | 1            |
| DMDD   | DMDD1835  | 20                      | 1            |
| EMAP   | EMA:36    | 22                      | 1            |
| EMAP   | EMA:37    | 22                      | 1            |
| DMDD   | DMDD1834  | 19                      | 2            |
| DMDD   | DMDD3544  | 20                      | 2            |
| EMAP   | EMA:28    | 22                      | 2            |
| DMDD   | DMDD3527  | 24                      | 2            |
| DMDD   | DMDD3541  | 24                      | 2            |
| DMDD   | DMDD3528  | 25                      | 2            |
| DMDD   | DMDD3532  | 25                      | 2            |
| DMDD   | DMDD3500  | 26                      | 2            |
| DMDD   | DMDD3510  | 27                      | 2            |
| DMDD   | DMDD3514  | 27                      | 2            |
| DMDD   | DMDD3521  | 27                      | 2            |
| DMDD   | DMDD3524  | 27                      | 2            |
| DMDD   | DMDD3538  | 27                      | 2            |
| DMDD   | DMDD3517  | 25                      | 3            |
| DMDD   | DMDD3507  | 26                      | 3            |
| DMDD   | DMDD3536  | 26                      | 3            |
| DMDD   | DMDD3531  | 27                      | 3            |
| DMDD   | DMDD3506  | 28                      | 3            |
| DMDD   | DMDD1904  | 31                      | 3            |
| DMDD   | DMDD1911  | 31                      | 3            |

Movie S1. Model I simulation with basic model conditions.

Movie S2. Mouse live imaging of early neural tube closure at E8.5, somite position 4.5, transverse view. Magenta, cell membrane; white, nucleus.

Movie S3. Model I simulation with midline tapering ( $h_{NP}/h_{HP} = 2$  and  $w_{HP} = 2h_{NP}$ ).

Movie S4. Model I simulation with midline intrinsic curvature ( $\kappa_{mid} = \kappa_{max}$  and  $w_{HP} = 2h_{NP}$ ).

Movie S5. Model I simulation with dorsolateral intrinsic curvature ( $\kappa_{mid} = \kappa_{max}/2$ ,  $w_{HP} = 2h_{NP}$  and  $d = 2h_{NP}$ ).

Movie S6. Model I simulation combining midline tapering and midline intrinsic curvature ( $h_{NP}/h_{HP} = 2$ ,  $\kappa_{mid} = \kappa_{max}$  and  $w_{HP} = 2h_{NP}$ ).

Movie S7. Model I simulation as in Movie S6 with a NNE thickness profile ( $h_{NNE} = 8 \mu\text{m}$ ,  $w_{NNE} = 125 \mu\text{m}$  on both sides,  $w_{NP} = 250 \mu\text{m}$ ).

Movie S8. Model I simulation as in Movie S7 with differential width expansion. NNE expands in width while NP width stays constant. Final total tissue width is 1000  $\mu\text{m}$ .

Movie S9. Model I simulation as in Movie S8 with NP border intrinsic outward curvature ( $\kappa_{mid} = -\kappa_{max}$  and  $w_{BHP} = 2h_{NP}$ ).

Movie S10. Model II simulation mimicking Closure 1 (concave initial configuration). Green, NNE; Blue, NP.

Movie S11. Model II simulation mimicking Closure 1 (concave initial configuration), with NP width decrease over time (convergent extension). Green, NNE; Blue, NP.

Movie S12. Model II simulation mimicking Closure 1 (concave initial configuration), without midline tapering. Green, NNE; Blue, NP.

Movie S13. Model II simulation mimicking folding in the posterior neuropore (flat initial configuration), without zippering, mesoderm area increase factor  $\alpha = 1$ . Green, NNE; Blue, NP.

Movie S14. Model II simulation mimicking folding in the posterior neuropore (flat initial configuration), without zippering, mesoderm area increase factor  $\alpha = 1.75$ . Green, NNE; Blue, NP.

Movie S15. Model II simulation mimicking folding in the posterior neuropore (flat initial configuration), with zippering, mesoderm area increase factor  $\alpha = 1$  (Mode 1). Green, NNE; Blue, NP.

Movie S16. Model II simulation mimicking folding in the posterior neuropore (flat initial configuration), with zippering, mesoderm area increase factor  $\alpha = 0.45$  (Mode 2). Green, NNE; Blue, NP.

Movie S17. Model II simulation mimicking folding in the posterior neuropore (flat initial configuration), with zippering, mesoderm area increase factor  $\alpha = 0.15$  (Mode 3). Green, NNE; Blue, NP.
